# Supplementary material for: Cost-Effectiveness of an Organized Lung Cancer Screening Program for Asbestos-Exposed Subjects
Source: MDPI journal article supplement (doi:10.3390/cancers14174089), 2022-08-24
Supplement: s1 [file s1]

**Supplementary Figure S1.** Scatter plot of the main analysis: Population with occupational asbestos exposure, 1-year interval between low-dose thoracic computed-tomography scans, screening started at 55 years old and lifetime time horizon. ICER, incremental cost-effectiveness ratio; QALYs, quality-adjusted life years.

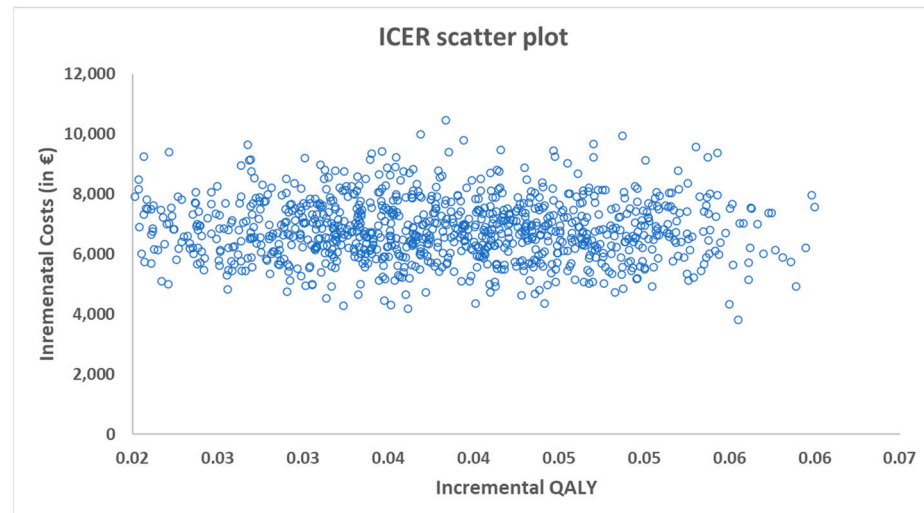

**Supplementary Figure S2.** Cost-effectiveness analysis curve

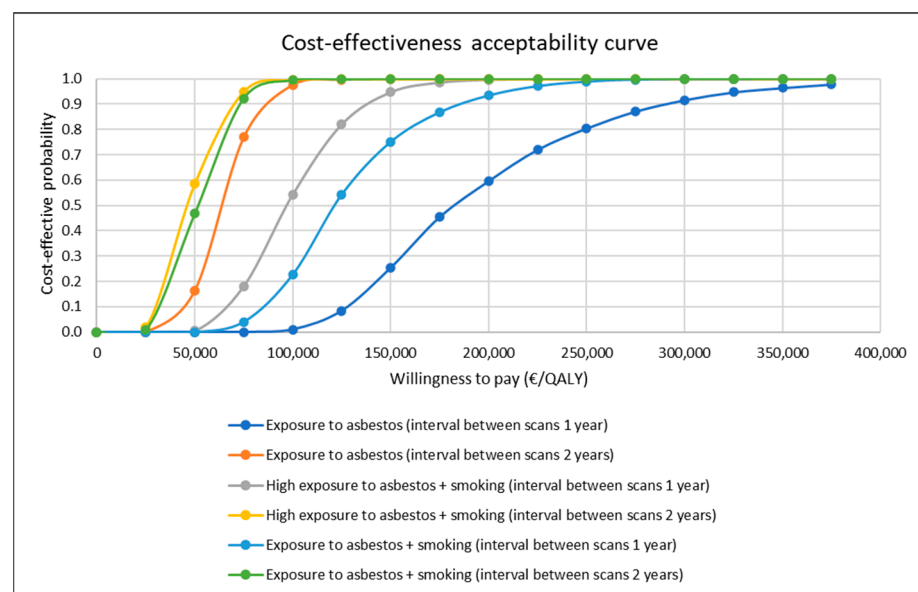

**Supplementary Table S1.** French General Population Mortality 2019 (INED).

| French General Population Mortality 2019 (source : INED) |     |
|----------------------------------------------------------|-----|
| No. of deaths per year per 1000 living persons           | Age |
| 2                                                        | 45  |
| 2                                                        | 46  |
| 2                                                        | 47  |
| 2                                                        | 48  |
| 2                                                        | 49  |
| 3.2                                                      | 50  |
| 3.2                                                      | 51  |
| 3.2                                                      | 52  |

|      |     |
|------|-----|
| 3.2  | 53  |
| 3.2  | 54  |
| 4.9  | 55  |
| 4.9  | 56  |
| 4.9  | 57  |
| 4.9  | 58  |
| 4.9  | 59  |
| 7.5  | 60  |
| 7.5  | 61  |
| 7.5  | 62  |
| 7.5  | 63  |
| 7.5  | 64  |
| 10.6 | 65  |
| 10.6 | 66  |
| 10.6 | 67  |
| 10.6 | 68  |
| 10.6 | 69  |
| 18.1 | 70  |
| 18.1 | 71  |
| 18.1 | 72  |
| 18.1 | 73  |
| 18.1 | 74  |
| 18.1 | 75  |
| 18.1 | 76  |
| 18.1 | 77  |
| 18.1 | 78  |
| 18.1 | 79  |
| 57.3 | 80  |
| 57.3 | 81  |
| 57.3 | 82  |
| 57.3 | 83  |
| 57.3 | 84  |
| 57.3 | 85  |
| 57.3 | 86  |
| 57.3 | 87  |
| 57.3 | 88  |
| 57.3 | 89  |
| 183  | 90  |
| 183  | 91  |
| 183  | 92  |
| 183  | 93  |
| 183  | 94  |
| 183  | 95  |
| 183  | 96  |
| 183  | 97  |
| 183  | 98  |
| 183  | 99  |
| 183  | 100 |
| 183  | 101 |
| 183  | 102 |
| 183  | 103 |

|     |     |
|-----|-----|
| 183 | 104 |
| 183 | 105 |
| 183 | 106 |
| 183 | 107 |
| 183 | 108 |
| 183 | 109 |
| 183 | 110 |
| 183 | 111 |
| 183 | 112 |
| 183 | 113 |
| 183 | 114 |
| 183 | 115 |

**Supplementary Table S2.** Costs in Euros of ARDCO Cohort and Individual Non-Intervention-Subject-Initiated Care

| Option                                                                                      | ARDCO cohort | Individual subject care |
|---------------------------------------------------------------------------------------------|--------------|-------------------------|
| <b>Option 1 <sup>1</sup></b>                                                                |              |                         |
| <b>French National Health Insurance data main analysis (N = 10,560)</b>                     |              |                         |
| Total costs (from common classification of medical procedures)                              | 75,886 €     | 7 €                     |
| Total costs (from homogeneous patient group, private facility hospitalizations, category 4) | 189,798 €    | 19 €                    |
| Total costs (FNHI)                                                                          |              | 26 €                    |
| <b>Option 2</b>                                                                             | 167,606      | 157,823                 |
| <b>Questionnaire response data (sensitivity analysis) (N = 3,287)</b>                       | 112,202      | 99,531                  |
| Total cost (Questionnaire)                                                                  |              | 170 €                   |

<sup>1</sup>Care use was calculated using the extraction of the FNHI data for homogeneous patient group (GHMs, = private hospitalizations) and common classification of medical procedures (CCAM codes) for respiratory procedures performed in the private sector, during the year 2018.

**Supplementary Table S3.** Costs Generated by Lung Cancer Screening and Management of False-Positive Findings.

| Detailed action billed              |                                                              | Cost      |
|-------------------------------------|--------------------------------------------------------------|-----------|
| Screening for lung cancer           |                                                              |           |
| Subject selection                   |                                                              | 46 €      |
| Low-dose thoracic CT scan           |                                                              | 86 €      |
| Examination                         | CT scan without contrast injection                           | 30 €      |
| Surcharge Y (+15.8%)                | Radiography by a radiologist, pneumologist or rheumatologist |           |
| Image-archiving                     |                                                              | 0.78 €    |
| Fixed-rate technical costs          |                                                              | 30 – 62 € |
| Pneumology consultation             |                                                              | 46 €      |
| Organizational costs                |                                                              | 11 €      |
| <b>Total cost (mean per person)</b> |                                                              | 189 €     |
| False-positive findings             |                                                              |           |
| CT scan with contrast injection     | 100%                                                         | 86 €      |
| Brain CT scan                       | 80%                                                          | 86 €      |
| Abdominal CT scan                   | 80%                                                          | 86 €      |
| Bronchial fibroscopy                | 80%                                                          | 96 €      |

|                                     |       |               |
|-------------------------------------|-------|---------------|
| Positron-emission tomography scan   | 80%   | 840 €         |
| Pulmonary function tests            | 24.6% | 137 €         |
| Mediastinoscopy                     | 2%    | 2221 €        |
| Scan-guided puncture                | 4%    | 115 €         |
| Thoracotomy                         | 21.3% | 4437 €        |
| <b>Total cost (mean per person)</b> |       | <b>2110 €</b> |

Abbreviations; CT, computed tomography.

**Supplementary Table S4.** Cost-Utility Analysis of the Annual and Biennial LDTDT-Scan Screening Strategies.

| Strategy       | Age at onset | Smoking AND as-<br>bestos exposure |          | Smoking      |          | High asbestos expo-<br>sure   |          | Asbestos exposure                 |          |
|----------------|--------------|------------------------------------|----------|--------------|----------|-------------------------------|----------|-----------------------------------|----------|
|                |              | Time horizon                       |          | Time horizon |          | Time horizon                  |          | Time horizon                      |          |
|                |              | 10 yr                              | Lifetime | 10 yr        | Lifetime | 10 yr                         | Lifetime | 10 yr                             | Lifetime |
| Annual LDTDT   |              |                                    |          |              |          |                               |          |                                   |          |
|                | 50 yr        | 419,247                            | 103,039  | 417,438      | 117,769  | 670,873                       | 152,324  | 747,661                           | 170,485  |
|                | 55 yr        | 274,345                            | 90,624   | 394,322      | 114,854  | 584,079                       | 146,952  | 720,257                           | 171,575  |
| Biennial LDTDT | 60 yr        | 182,968                            | 90,809   | 411,857      | 117,955  | 531,025                       | 155,982  | 803,737                           | 187,957  |
|                |              |                                    |          |              |          |                               |          |                                   |          |
|                | 50 yr        | 108,027                            | 47,661   | 107,652      | 52,179   | 160,950                       | 61,387   | 177,237                           | 66,386   |
|                | 55 yr        | 89,035                             | 45,331   | 102,262      | 49,195   | 147,498                       | 58,743   | 167,985                           | 64,023   |
|                | 60 yr        | 60,622                             | 41,597   | 115,710      | 51,099   | 145,898                       | 60,170   | 197,306                           | 69,005   |
|                |              |                                    |          |              |          |                               |          |                                   |          |
|                |              | Pleural plaque(s)                  |          | Asbestosis   |          | Smokers and former<br>smokers |          | Intermediate asbestos<br>exposure |          |
|                |              | Time horizon                       |          | Time horizon |          | Time horizon                  |          | Time horizon                      |          |
|                |              | 10 yr                              | Lifetime | 10 yr        | Lifetime | 10 yr                         | Lifetime | 10 yr                             | Lifetime |
| Annual LDTDT   |              |                                    |          |              |          |                               |          |                                   |          |
|                | 50 yr        | 791,111                            | 167,606  | 482,004      | 112,202  | 642,683                       | 167,076  | 774,334                           | 173,469  |
|                | 55 yr        | 690,974                            | 157,823  | 319,788      | 99,531   | 740,137                       | 185,396  | 730,670                           | 174,300  |
| Biennial LDTDT | 60 yr        | 633,257                            | 157,215  | 214,072      | 101,620  | 1,552,823                     | 231,089  | 778,404                           | 193,499  |
|                |              |                                    |          |              |          |                               |          |                                   |          |
|                | 50 yr        | 186,464                            | 65,916   | 121,105      | 50,067   | 154,979                       | 65,146   | 182,901                           | 67,196   |
|                | 55 yr        | 170,732                            | 60,790   | 100,235      | 48,011   | 155,809                       | 65,146   | 172,070                           | 65,241   |
|                | 60 yr        | 169,697                            | 61,333   | 69,183       | 44,366   | 267,433                       | 79,123   | 194,727                           | 70,090   |
|                |              |                                    |          |              |          |                               |          |                                   |          |

Values are expressed in Euros.  
LDTDT, low-dose thoracic computed tomography scan.
